# Supplementary material for: Evaluation of Drought Responses in Two Tropaeolum Species Used in Landscaping through Morphological and Biochemical Markers
Source: MDPI journal article supplement (doi:10.3390/life13040960), 2023-04-06
Supplement: s1 [file s1]

**Table S1.** Correlation coefficients between the first two PCs (PC1 and PC2) and the variables included in PCA. Abbreviations: Carotenoids (Caro), total chlorophyll (Chl tot), total dry weight (DWtot), dualox anthocyanins (Dx Ant), dualox total chlorophyll (Dx Chl tot), dualox nitrogen balance index (NBI), dualox flavonols (Dx TF), total fresh weight (FWtot), hydrogen peroxide (H<sub>2</sub>O<sub>2</sub>), leaf number (LN), malondialdehyde (MDA), proline (PRO), root length (RL), stem diameter (SD), stem length (SL), soil water content (soil WC), total flavonoids (TF), total phenolic compounds (TPC), total soluble sugars (TSS), leaf water content (WCI), root water content (WCr), stem water content (WCs), IWS - intermediate water stress, CON - control, SWS - severe water stress.

|                               | PC1    |       | PC2    |       |
|-------------------------------|--------|-------|--------|-------|
|                               | R      | P     | R      | P     |
| <i>Quantitative variables</i> |        |       |        |       |
| Caro                          | 0.720  | 0.000 | -0.344 | 0.040 |
| Chl tot                       | 0.644  | 0.000 | -0.425 | 0.010 |
| DWtot                         | 0.305  | 0.070 | 0.723  | 0.000 |
| Dx Ant                        | -0.612 | 0.000 | 0.305  | 0.070 |
| Dx Chl tot                    | 0.705  | 0.000 | -0.386 | 0.020 |
| Dx NBI                        | -0.599 | 0.000 | -0.359 | 0.032 |
| Dx TF                         | 0.906  | 0.000 | -0.032 | 0.855 |
| FWtot                         | 0.188  | 0.273 | 0.697  | 0.000 |
| H <sub>2</sub> O <sub>2</sub> | 0.753  | 0.000 | -0.032 | 0.854 |
| LN                            | -0.189 | 0.269 | 0.636  | 0.000 |
| MDA                           | -0.239 | 0.161 | -0.525 | 0.001 |
| PRO                           | -0.128 | 0.456 | -0.655 | 0.000 |
| RL                            | 0.367  | 0.028 | 0.051  | 0.769 |
| SD                            | -0.074 | 0.668 | 0.584  | 0.000 |
| SL                            | -0.689 | 0.000 | -0.182 | 0.288 |
| Soil WC                       | 0.253  | 0.136 | 0.645  | 0.000 |
| TF                            | 0.858  | 0.000 | -0.018 | 0.918 |
| TPC                           | 0.781  | 0.000 | -0.026 | 0.882 |
| TSS                           | 0.093  | 0.591 | 0.015  | 0.932 |
| WCI                           | 0.447  | 0.006 | 0.128  | 0.457 |
| WCr                           | -0.200 | 0.243 | 0.072  | 0.678 |
| WCs                           | -0.481 | 0.003 | -0.216 | 0.205 |
| <i>Categorical variables</i>  |        |       |        |       |
| IWS                           | 0.778  | 0.199 | 1.737  | 0.000 |
| CON                           | 0.747  | 0.218 | -0.010 | 0.983 |
| SWS                           | -1.524 | 0.009 | -1.727 | 0.000 |
| <i>T. majus</i>               | -1.417 | 0.000 | 0.401  | 0.219 |
| <i>T. minus</i>               | 1.417  | 0.000 | -0.401 | 0.219 |

**Table S2.** Variation of growth parameters such as stem length (vSL), root length (vRL), stem diameter (vSD), leaf number (vLN), fresh weight root (vFWr), dry weight root (vDWr), fresh weight stem (vFWs), dry weight stem (vDWs), fresh weight leaves (vFWl), dry weight leaves (vDWl), root water content (vWCr), stem water content (vWCs), leaves water content (vWCl) in intermediate water stress (IWS) and severe water stress (SWS) calculated in percentage in relation to their respective control (CON) value.

| Parameter | <i>T. majus</i> |        |        | <i>T. minus</i> |        |        |
|-----------|-----------------|--------|--------|-----------------|--------|--------|
|           | CON             | IWS    | SWS    | CON             | IWS    | SWS    |
| SL        | 100.00          | 130.53 | 115.74 | 100.00          | 157.83 | 200.64 |
| RL        | 100.00          | 96.34  | 94.02  | 100.00          | 117.45 | 98.30  |
| SD        | 100.00          | 94.61  | 76.13  | 100.00          | 84.79  | 81.91  |
| LN        | 100.00          | 55.93  | 54.38  | 100.00          | 107.79 | 81.39  |
| FWr       | 100.00          | 113.44 | 78.66  | 100.00          | 243.08 | 143.85 |
| DWr       | 100.00          | 108.18 | 67.52  | 100.00          | 91.51  | 61.79  |
| FWs       | 100.00          | 82.50  | 57.98  | 100.00          | 83.61  | 52.50  |
| DWs       | 100.00          | 112.02 | 79.23  | 100.00          | 295.45 | 144.32 |
| FWl       | 100.00          | 102.52 | 72.39  | 100.00          | 78.43  | 43.62  |
| DWl       | 100.00          | 84.69  | 67.23  | 100.00          | 89.15  | 63.42  |
| WCr       | 100.00          | 111.81 | 106.86 | 100.00          | 60.05  | 99.27  |
| WCs       | 100.00          | 102.15 | 96.73  | 100.00          | 103.44 | 111.43 |
| WCl       | 100.00          | 99.86  | 97.58  | 100.00          | 99.46  | 96.66  |

**Table S3.** Variation of dualox optical sensor measurements such as total chlorophyll (vDx Chl tot), anthocyanins (vDx Ant), nitrogen balance index (vNBI), flavonols (vDx TF) in intermediate water stress (IWS) and severe water stress (SWS) calculated in percentage in relation to their respective control (CON) value.

| Parameter  | <i>T. majus</i> |        |        | <i>T. minus</i> |        |        |
|------------|-----------------|--------|--------|-----------------|--------|--------|
|            | CON             | IWS    | SWS    | CON             | IWS    | SWS    |
| Dx Chl tot | 100.00          | 110.28 | 103.11 | 100.00          | 109.74 | 92.49  |
| Dx Ant     | 100.00          | 101.75 | 102.34 | 100.00          | 96.10  | 112.34 |
| NBI        | 100.00          | 99.58  | 104.29 | 100.00          | 113.93 | 146.24 |
| Dx TF      | 100.00          | 116.24 | 100.77 | 100.00          | 106.45 | 62.11  |

**Table S4.** Variation of biochemical parameters such as Chlorophyll *a* (vChl a), Chlorophyll *b* (vChl b), carotenoids (vCaro), proline (vPRO), malondialdehyde (vMDA), total phenolic compounds (vTPC), total flavonoids (vTF), total soluble sugars (vTSS), hydrogen peroxide (vH<sub>2</sub>O<sub>2</sub>) in intermediate water stress (IWS) and severe water stress (SWS) calculated in percentage in relation to their respective control (CON) value.

| Parameter                     | <i>T. majus</i> |        |        | <i>T. minus</i> |        |        |
|-------------------------------|-----------------|--------|--------|-----------------|--------|--------|
|                               | CON             | IWS    | SWS    | CON             | IWS    | SWS    |
| Chl a                         | 100.00          | 149.55 | 116.25 | 100.00          | 89.59  | 83.74  |
| Chl b                         | 100.00          | 137.24 | 127.27 | 100.00          | 91.78  | 89.85  |
| Caro                          | 100.00          | 135.62 | 120.37 | 100.00          | 85.20  | 79.88  |
| Pro                           | 100.00          | 94.18  | 175.35 | 100.00          | 154.10 | 392.27 |
| MDA                           | 100.00          | 129.24 | 193.80 | 100.00          | 124.08 | 165.53 |
| TF                            | 100.00          | 111.60 | 119.83 | 100.00          | 99.00  | 51.56  |
| TPC                           | 100.00          | 111.88 | 106.69 | 100.00          | 110.30 | 73.68  |
| TSS                           | 100.00          | 98.34  | 91.22  | 100.00          | 111.96 | 107.91 |
| H <sub>2</sub> O <sub>2</sub> | 100.00          | 136.13 | 107.30 | 100.00          | 100.42 | 45.91  |

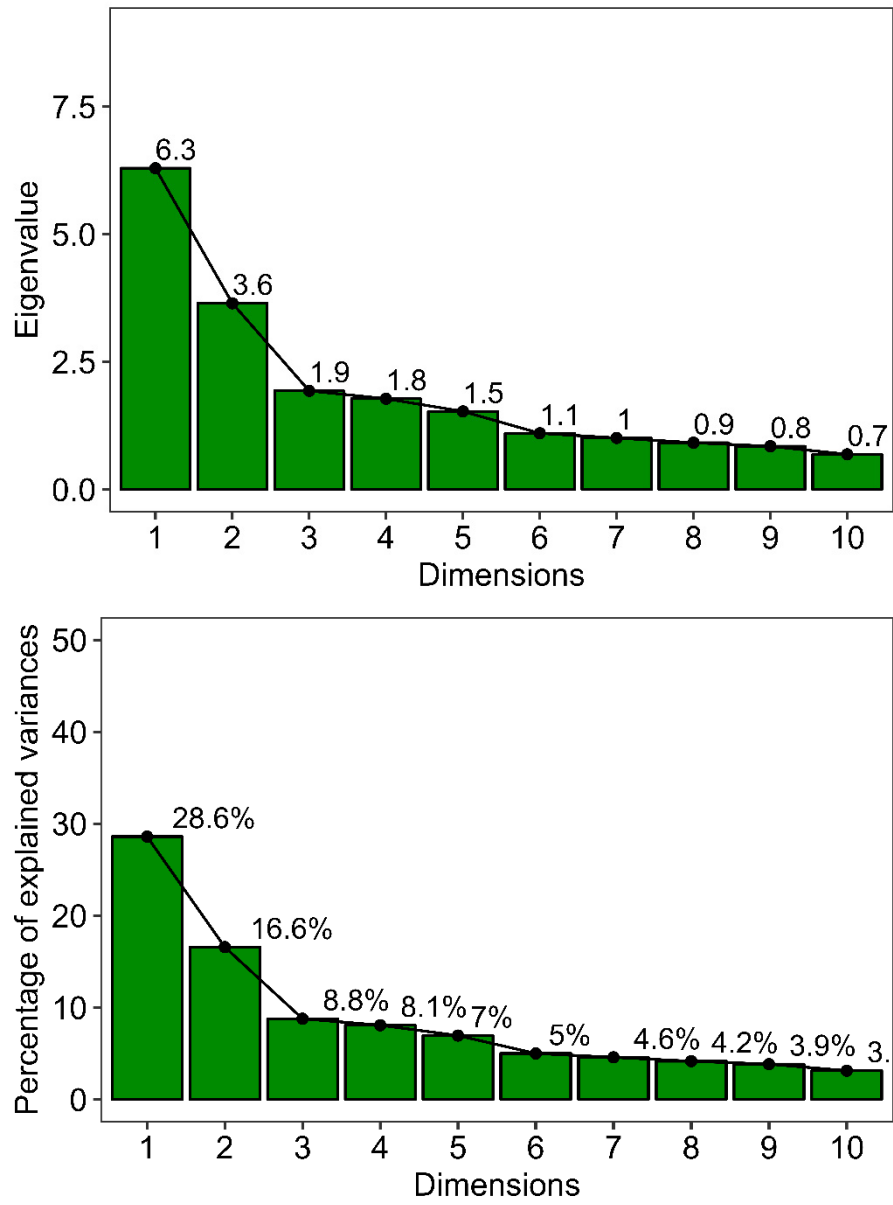

**Figure S1.** Eigen analysis of PCA
